# Supplementary material for: Fostering the Sustainability of Artisanal and Small-Scale Mining (ASM) of Barite in Nasarawa State, Nigeria
Source: MDPI journal article supplement (doi:10.3390/su13115917), 2021-05-24
Supplement: s1 [file s1]

Archive with 1 entries (1 files):
- sustainability-1206939-supplementary.pdf
